# Supplementary material for: Innate Lymphoid Cells Activation and Transcriptomic Changes in Response to Human Dengue Infection
Source: PubMed Central journal article supplement (PMC8165392; doi:10.3389/fimmu.2021.599805), 2021-05-17
Supplement: DataSheet_1.pdf [file DataSheet_1.pdf]

## *Supplementary Materials*

### **List of Supplementary Data**

- Supplementary Figure 1.** Volcano plots showing differentially expressed genes comparing between febrile and convalescent phases in DF and DHF.
- Supplementary Figure 2.** Heatmap showing relative expression (TPM) of DE genes after applying ‘apeglm’ in each sample arranged by severity (DF, DHF) and timepoints (febrile, convalescence).
- Supplementary Figure 3.** Gene expression in public data from Li and colleagues (GSE112591).
- Supplementary Figure 4.** Gene expression in public data from Kløverpris and colleagues (GSE77088).
- Supplementary Table 1.** Characteristics of the DF and DHF patients whose blood samples were used in this study
- Supplementary Table 2.** List of antibodies used in flow cytometry experiments
- Supplementary Table 3.** List of primers used in qPCR experiments
- Supplementary Table 4\*.** Differentially expressed genes comparing febrile and convalescent phase of DF patients.
- Supplementary Table 5\*.** Differentially expressed genes comparing febrile and convalescent phase of DHF patients.
- Supplementary Table 6\*.** Differentially expressed genes comparing febrile and convalescent phase of DF patients after applying ‘apeglm’ to re-estimate log<sub>2</sub> fold change.
- Supplementary Table 7\*.** Differentially expressed genes comparing febrile and convalescent phase of DHF patients after applying ‘apeglm’ to re-estimate log<sub>2</sub> fold change.

\* Supplementary Table 4-7 were uploaded in separated files

**Supplementary Figure 1**
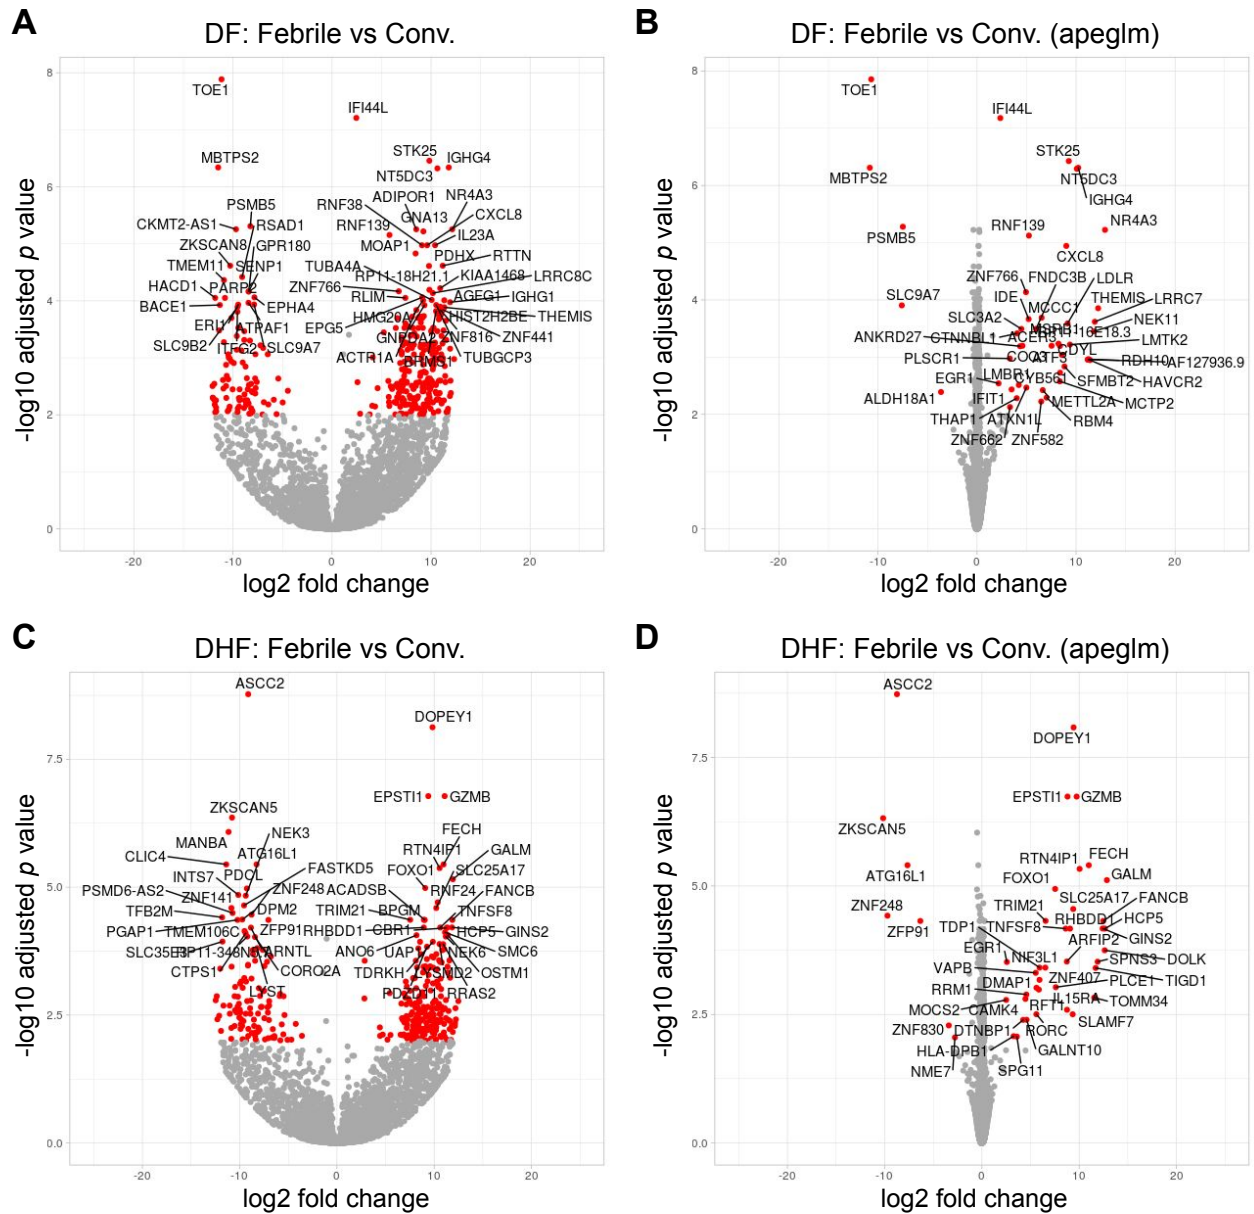

**Supplementary Figure 1.** Volcano plots showing differentially expressed genes comparing between febrile and convalescent phases in DF (**A, B**) and DHF (**C, D**). DE analysis results from DESeq2 are plotted in (A,C) while volcano plots after applying ‘apeglm’ algorithm to re-estimate fold changes are shown in (B,D). Red dots highlighted statistically significant genes with adjusted  $p$  value  $< 0.01$  and  $\log_2$  fold change  $> 2$ . Only the top 50 significant genes are labelled in (A,C).

Supplementary Figure 2

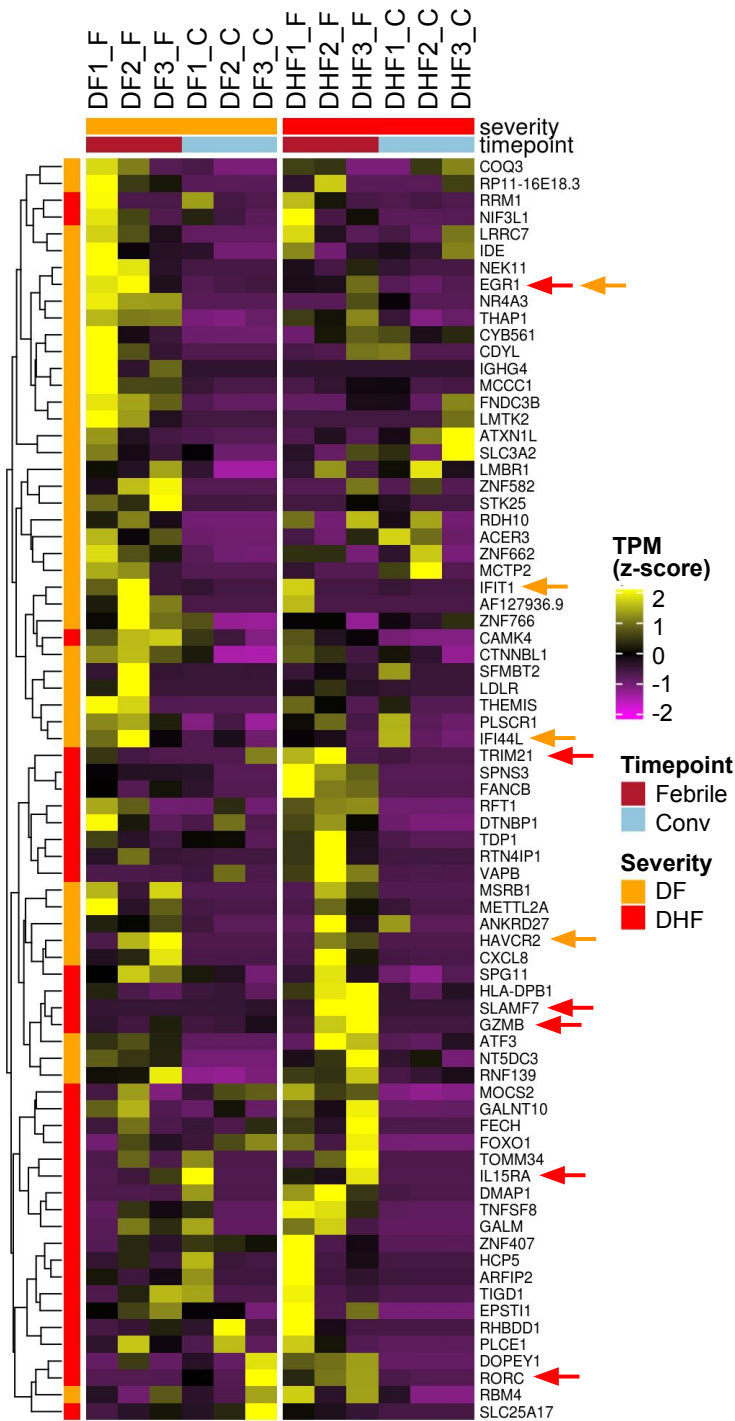

**Supplementary Figure 2.** Heatmap showing relative expression (TPM) of DE genes after applying ‘apeglm’ in each sample arranged by severity (DF, DHF) and timepoints (febrile, convalescence). Arrows indicate immune related genes significantly upregulated in febrile DF (orange) and DHF (red) as compared to paired convalescence samples.

Supplementary Figure 3

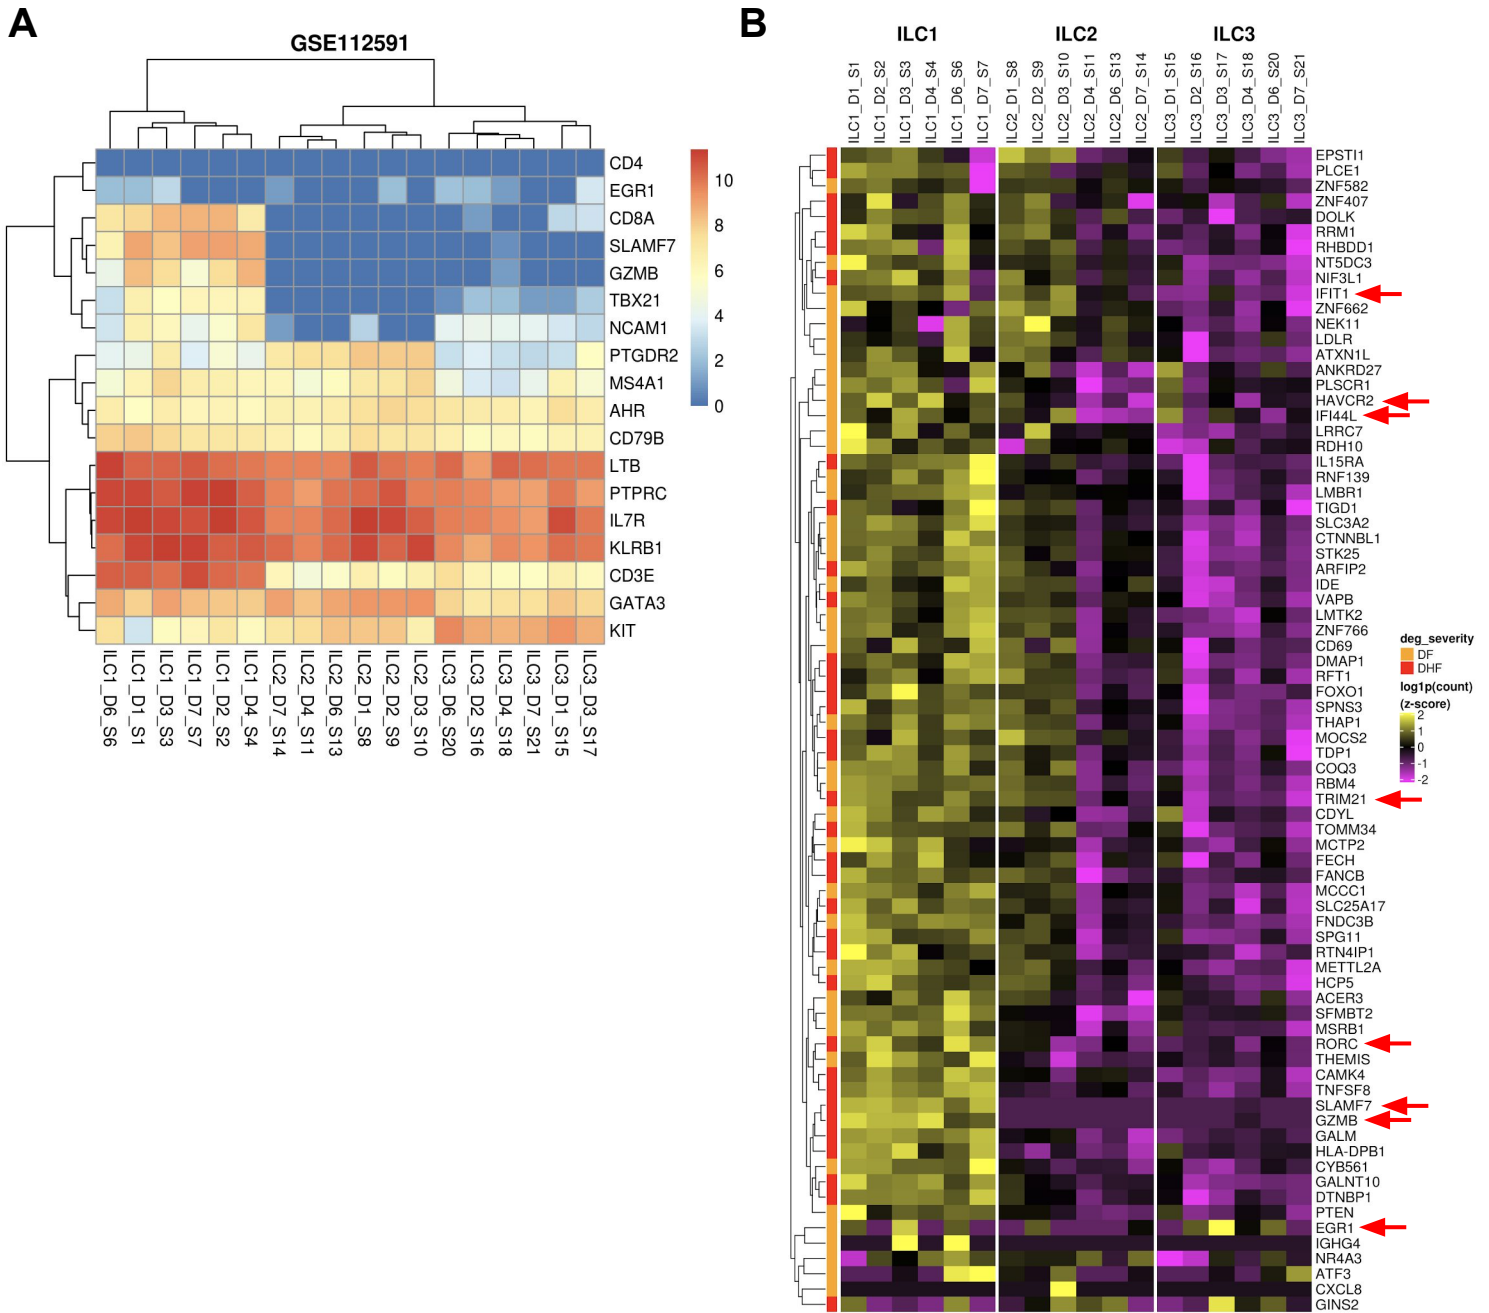

**Supplementary Figure 3.** Gene expression in public data from Li and colleagues (GSE112591). **(A)** Heatmap showing expression level of known hILC and their subsets signature genes. **(B)** Heatmap showing expression level of genes that are differentially expressed either in DF or DHF (as in Supplementary Figure 2) in GSE112591 healthy ILC subset dataset.

Supplementary Figure 4

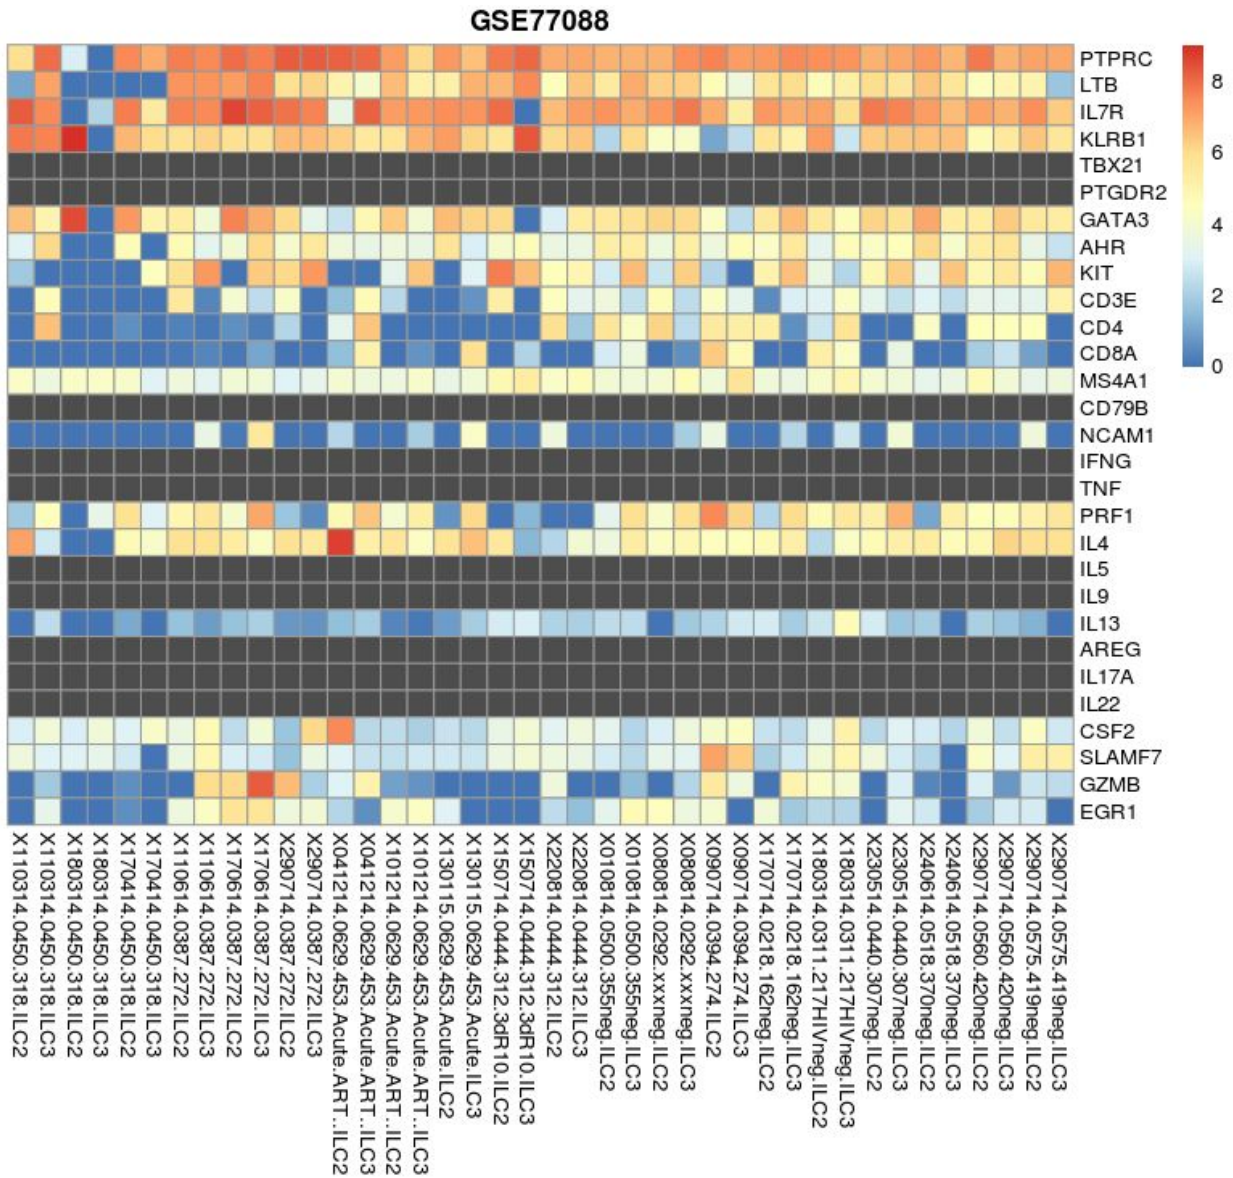

**Supplementary Figure 4.** Gene expression in public data from Kløverpris and colleagues (GSE77088). Heatmap showing expression level of known hILC and their subsets signature genes.

**Supplementary Table 1**

| <b>Surface flow cytometric experiment</b>                  |                                   |                                   |                                          |
|------------------------------------------------------------|-----------------------------------|-----------------------------------|------------------------------------------|
|                                                            | <b>DF<br/>(n = 10)</b>            | <b>DHF<br/>(n = 10)</b>           | <b>P value<br/>(Mann–Whitney U test)</b> |
| Age, median in years<br>(IQR)                              | 31<br>(19.0-36.5)                 | 22.5<br>(17.75-34.5)              | 0.75                                     |
| Gender (% Male)                                            | 40.00%                            | 60.00%                            | N/A                                      |
| DENV viral load, median<br>copies number per ml<br>(IQR)   | 2.41E+05<br>(1.54E+04 - 5.86E+08) | 7.54E+06<br>(8.61E+05 - 1.74E+07) | 0.45                                     |
| <b>Intracellular cytokine staining analysis experiment</b> |                                   |                                   |                                          |
|                                                            | <b>DF<br/>(n = 10)</b>            | <b>DHF<br/>(n = 14)</b>           | <b>P value<br/>(Mann–Whitney U test)</b> |
| Age, median in years<br>(IQR)                              | 22<br>(19.0-32.0)                 | 24<br>(19.0-27.0)                 | 0.62                                     |
| Gender (% Male)                                            | 40.00%                            | 50.00%                            | N/A                                      |
| DENV viral load, median<br>copies number per ml<br>(IQR)   | 1.25E+07<br>(1.22E+04 - 4.10E+07) | 2.76E+05<br>(6.25E+03 - 5.03E+08) | 0.73                                     |

**Supplementary Table 1.** Characteristics of the DF and DHF patients whose blood samples were used in this study

**Supplementary Table 2**

| Reagents/Target                                                      | Fluorochrome         | Vendor        | Clones                               | Experiment              | RRID                       |
|----------------------------------------------------------------------|----------------------|---------------|--------------------------------------|-------------------------|----------------------------|
| Human TruStain FcX™                                                  | -                    | BioLegend     | -                                    | Phenotyping/Sorting/ICS | BioLegend Cat# 422302      |
| LIVE/DEAD™ Fixable Violet Dead Cell Stain Kit, for 405 nm excitation | -                    | Invitrogen    | -                                    | Phenotyping             | Invitrogen Cat# L34963     |
| LIVE/DEAD™ Fixable Red Dead Cell Stain Kit, for 488 nm excitation    | -                    | Invitrogen    | -                                    | Sorting                 | Invitrogen Cat# L34971     |
| Zombie Violet™ Fixable Viability Kit                                 | -                    | BioLegend     | -                                    | ICS                     | BioLegend Cat# 423114      |
| Lineage Cocktail (CD3, CD14, CD16, CD19, CD20, CD56)                 | FITC                 | BioLegend     | UCHT1, HCD14, 3G8, HIB19, 2H7, HCD56 | Phenotyping/Sorting/ICS | BioLegend Cat# 348801      |
| CD127 (IL-7Rα)                                                       | APC/Cy7              | BioLegend     | A019D5                               | Phenotyping             | BioLegend Cat# 351348      |
| CD127 (IL-7Rα)                                                       | APC/Fire750          | BioLegend     | A019D5                               | Sorting/ICS             | BioLegend Cat# 351350      |
| CD117                                                                | PE                   | BD Bioscience | YB5.B8                               | Phenotyping             | BD Biosciences Cat# 561682 |
| CD294                                                                | Alexa Fluor 647      | BD Bioscience | BM16                                 | Phenotyping             | BD Biosciences Cat# 558042 |
| CD69                                                                 | Alexa Fluor 700      | BD Bioscience | FN50                                 | Phenotyping             | BD Biosciences Cat# 560739 |
| CD45                                                                 | V500                 | BD Bioscience | HI30                                 | Phenotyping             | BD Biosciences Cat# 560777 |
| IFN-γ                                                                | PE                   | BD Bioscience | 4S.B3                                | ICS                     | BD Biosciences Cat# 559326 |
| IL-4                                                                 | Brilliant Violet 510 | BioLegend     | MP4-25D2                             | ICS                     | BioLegend Cat# 500836      |
| IL-13                                                                | PerCP/Cy5.5          | BioLegend     | JES10-5A2                            | ICS                     | BioLegend Cat# 501911      |
| IL-17A                                                               | Alexa Fluor 700      | BioLegend     | BL168                                | ICS                     | BioLegend Cat# 512318      |
| IL-10                                                                | Alexa Fluor 647      | BioLegend     | JES3-9D7                             | ICS                     | BioLegend Cat# 501412      |

**Supplementary Table 2.** List of antibodies used in flow cytometry experiments (ICS = intracellular cytokine staining).

**Supplementary Table 3**

| Gene   | Forward Primer          | Reverse Primer         |
|--------|-------------------------|------------------------|
| GZMB   | CCCTGGGAAAACACTCACACA   | GCACAACCAATGGTACTGTCG  |
| HAVCR2 | AGACAGTGGGATCTACTGCTG   | CCTGGTGGTAAGCATCCTTGG  |
| TRIM21 | GTCCTGGAAAGGAGTGAGTCC   | CTGAAAGTATCAGCCACGGATT |
| SLAMF7 | TCAGGGATCTACTATGTGGGGA  | GGTGCCATTCTTATTGCTCTGC |
| IFNG   | TCGGTAACTGACTTGAATGTCCA | TCGCTTCCCTGTTTTAGCTGC  |
| ACTB   | CATGTACGTTGCTATCCAGGC   | CTCCTTAATGTCACGCACGAT  |

**Supplementary Table 3.** List of primers used in quantitative PCR experiments
