# Supplementary material for: Innate Lymphoid Cells Activation and Transcriptomic Changes in Response to Human Dengue Infection
Source: Front Immunol. 2021 May 17;12:599805. doi: 10.3389/fimmu.2021.599805 (PMC8165392; doi:10.3389/fimmu.2021.599805)
Supplement: Supplementary file 5 [file Table_7.xlsx]

## Sheet: T7
Supplementary Table 7: Differentially expressed genes comparing febrile and convalescent phase of DHF patients after applying ‘apeglm’ to re-estimate log2 fold change.
ENSG	baseMean	log2FoldChange	lfcSE	pvalue	padj	genes
ENSG00000143891.16	455.757	12.8501	3.75608	9.29971e-09	7.68663e-06	GALM
ENSG00000206337.10	417.104	12.6486	4.1217	2.41383e-07	6.74917e-05	HCP5
ENSG00000175283.7	489.696	12.6259	4.35378	1.03955e-06	0.000178332	DOLK
ENSG00000181544.13	347.012	12.4741	3.85478	1.41001e-07	4.79775e-05	FANCB
ENSG00000131153.8	333.869	12.413	3.88572	2.21757e-07	6.72072e-05	GINS2
ENSG00000182557.7	276.694	11.8987	4.01117	2.12509e-06	0.000297251	SPNS3
ENSG00000221944.4	275.197	11.6909	4.11145	3.33551e-06	0.000393548	TIGD1
ENSG00000025772.7	362.155	11.5447	4.92923	2.10223e-05	0.00148919	TOMM34
ENSG00000066926.10	443.316	10.991	2.41252	3.9052e-09	3.94512e-06	FECH
ENSG00000130347.12	503.435	10.0444	2.27903	5.10766e-09	4.64389e-06	RTN4IP1
ENSG00000100453.12	1816.47	9.73904	3.09022	7.55952e-11	1.82068e-07	GZMB
ENSG00000083097.14	547.493	9.42433	1.41576	1.80714e-12	8.21526e-09	DOPEY1
ENSG00000100372.14	350.128	9.38633	2.04117	5.74667e-08	2.80722e-05	SLC25A17
ENSG00000026751.16	425.713	9.33415	4.3186	6.62728e-05	0.0031383	SLAMF7
ENSG00000144468.16	419.684	9.05987	2.27864	2.4337e-07	6.74917e-05	RHBDD1
ENSG00000133106.14	772.787	8.80144	1.66141	8.01002e-11	1.82068e-07	EPSTI1
ENSG00000134470.19	190.363	8.74979	3.44303	4.90437e-05	0.00256268	IL15RA
ENSG00000132254.12	300.881	8.72851	3.28923	2.08039e-06	0.000295545	ARFIP2
ENSG00000106952.7	419.864	8.61115	3.43269	2.44965e-07	6.74917e-05	TNFSF8
ENSG00000138193.14	245.059	7.59595	2.82169	1.08773e-05	0.000932986	PLCE1
ENSG00000150907.6	654.287	7.52752	2.99877	1.50558e-08	1.14072e-05	FOXO1
ENSG00000132109.9	988.935	6.54651	2.16831	1.31336e-07	4.77641e-05	TRIM21
ENSG00000196290.14	443.66	6.52023	4.26411	3.24272e-06	0.000387932	NIF3L1
ENSG00000042088.13	680.649	5.92974	4.52595	3.23487e-06	0.000387932	TDP1
ENSG00000215421.9	422.4	5.91956	3.02396	7.0048e-06	0.000670396	ZNF407
ENSG00000163933.9	360.787	5.85164	3.35395	1.27688e-05	0.00103655	RFT1
ENSG00000178028.13	466.963	5.60911	2.58234	1.13708e-05	0.000957255	DMAP1
ENSG00000143365.16	231.77	5.5978	4.29491	6.56688e-05	0.00312597	RORC
ENSG00000124164.15	394.862	5.53285	5.29145	4.63221e-06	0.000489722	VAPB
ENSG00000164574.15	341.601	4.59697	3.27185	9.58428e-05	0.00401235	GALNT10
ENSG00000167325.14	637.595	4.57101	1.58222	1.70655e-05	0.001293	RRM1
ENSG00000152495.10	391.316	4.47238	4.18042	2.3186e-05	0.00157318	CAMK4
ENSG00000047579.19	462.387	4.23777	3.58098	9.71383e-05	0.00403279	DTNBP1
ENSG00000104133.14	930.125	3.5965	2.54514	0.000286131	0.00852952	SPG11
ENSG00000223865.10	873.827	3.25403	2.0072	0.000279114	0.00837527	HLA-DPB1
ENSG00000120738.7	3355.28	2.56649	0.655906	2.22376e-06	0.000301385	EGR1
ENSG00000164172.18	1866.87	2.4927	0.720112	2.44851e-05	0.00164902	MOCS2
